# Supplementary material
Source: ML conference proceedings conference paper supplement (https://proceedings.neurips.cc/paper_files/paper/2020/hash/662a2e96162905620397b19c9d249781-Abstract.html)
Supplement: Supplementary file [file 662a2e96162905620397b19c9d249781-Supplemental.pdf]

---

# Memorizing Gaussians with no over-parameterization via gradient descent on neural networks

---

Anonymous Author(s)

Affiliation

Address

email

## Abstract

1 Many results in recent years established polynomial time learnability of various  
2 models via neural networks algorithms (e.g. [3, 9, 7, 6, 17, 28, 18, 10, 4, 23, 19,  
3 13, 5]). However, unless the model is linearly separable [5], or the activation is  
4 quadratic [13], these results require very large networks – much more than what is  
5 needed for the mere existence of a good predictor.

6 In this paper we make a step towards learnability results with near optimal network  
7 size. We give a tight analysis on the rate in which the Neural Tangent Kernel[16], a  
8 fundamental tool in the analysis of SGD on networks, converges to its expectations.  
9 This results enable us to prove that SGD on depth two neural networks, starting  
10 from a (non standard) variant of Xavier initialization [15] can memorize samples,  
11 learn polynomials with bounded weights, and learn certain kernel spaces, with  
12 *near optimal* network size, sample complexity, and runtime. In particular, we show  
13 that SGD on depth two network with  $\tilde{O}\left(\frac{m}{d}\right)$  hidden neurons (and hence  $\tilde{O}(m)$   
14 parameters) can memorize  $m$  random labeled points in  $\mathbb{S}^{d-1}$ .

## 15 1 Introduction

16 Understanding the models (i.e. pairs  $(\mathcal{D}, f^*)$  of input distribution  $\mathcal{D}$  and target function  $f^*$ ) on which  
17 neural networks algorithms guaranteed to learn a good predictor is at the heart of deep learning  
18 theory today. In recent years, there has been an impressive progress in this direction. It is now known  
19 that neural networks algorithms can learn, in polynomial time, linear models, certain kernel spaces,  
20 polynomials, and memorization models (e.g. [3, 9, 7, 6, 17, 28, 18, 10, 4, 23, 19, 13, 5]).

21 Yet, while such models has been shown to be learnable in polynomial time and polynomial sized  
22 networks, the required size (i.e., number of parameteres) of the networks is still very large, unless the  
23 model is linear separable [5], or the activation is quadratic [13]. This means that the proofs are valid  
24 for networks whose size is significantly larger then the minimal size of the network that implements a  
25 good predictor<sup>1</sup>.

26 In this paper we make a progress in this direction. We first consider the neural tangent kernel [16],  
27 which is a linearization of the functions that can be computed by the network, with weights that are  
28 close to a given weight vector  $\mathbf{w}$ . The NTK is one of the main technical tools in recent analysis  
29 of SGD on neural networks. Our first result is a near optimal bound on the rate in which the NTK  
30 converge to its expectation. We then utilize this results, and prove that it implies that SGD on depth  
31 two networks, starting form a (somewhat non-standard) variant of Xavier initialization [15] can

---

<sup>1</sup>More specifically, we mean that the proofs require number of parameters that is suboptimal by a multiplicative factor that grows polynomially with one of the problem parameters – either the model capacity (margin, VC dimension, etc.), the desired error (i.e.  $\epsilon$ ), or the input dimension.

32 learn memorization models, polynomials, and kernel spaces, with *near optimal* network size, sample  
 33 complexity, and runtime (i.e. SGD iterations).

34 To the best of our knowledge, this is the first result which shows near optimal learnability of these  
 35 models, and we believe that the result about NTK will be an essential tool for further progress, and in  
 36 particular for proving a similar results for additional settings, architectures, and initialization schemes  
 37 (particularly, the standard Xavier initialization). We next give more details about our results.

38 **Neural Network Algorithm** We assume that the instance space is  $\mathbb{S}^{d-1}$  and consider depth 2  
 39 networks with  $2q$  hidden neurons. Such networks calculate a function of the form

$$h_{W,\mathbf{u}}(\mathbf{x}) = \sum_{i=1}^{2q} u_i \sigma(\langle \mathbf{w}_i, \mathbf{x} \rangle) = \langle \mathbf{u}, \sigma(W\mathbf{x}) \rangle$$

40 We assume that the network is trained via SGD, starting from random weights that are sampled  
 41 from the following variant of Xavier initialization [15]:  $W$  will be initialized to be a duplication

42  $W = \begin{bmatrix} W' \\ W' \end{bmatrix}$  of a matrix  $W'$  of standard Gaussians and  $\mathbf{u}$  will be a duplication of the all- $B$  vector in  
 43 dimension  $q$ , for some  $B > 0$ , with its negation. We will use rather large  $B$ , that will depend on the  
 44 model that we want to learn.

45 **Bounded distributions** Some of our results will depend on what we call the boundedness of  
 46 the data distribution. We say that a distribution  $\mathcal{D}$  on  $\mathbb{S}^{d-1}$  is  $R$ -bounded if for every  $\mathbf{u} \in \mathbb{S}^{d-1}$ ,  
 47  $\mathbb{E}_{\mathbf{x} \sim \mathcal{D}} \langle \mathbf{u}, \mathbf{x} \rangle^2 \leq \frac{R^2}{d}$ . To help the reader to calibrate our results, we first note that by Cauchy-  
 48 Schwartz, any distribution  $\mathcal{D}$  is  $\sqrt{d}$ -bounded, and this bound is tight in the cases that  $\mathcal{D}$  is supported  
 49 on a single point. Despite that, many distributions of interest are  $O(1)$ -bounded or even  $(1 + o(1))$ -  
 50 bounded. This includes the uniform distribution on  $\mathbb{S}^{d-1}$ , the uniform distribution on the discrete  
 51 cube  $\left\{ \pm \frac{1}{\sqrt{d}} \right\}^d$ , the uniform distribution on  $\Omega(d)$  random points, and more (see section A.5). For  
 52 simplicity, we will phrase our results in the introduction for  $O(1)$ -bounded distribution. We note that  
 53 if the distribution is  $R$ -bounded (rather than  $O(1)$ -bounded), our results suffer a multiplicative factor  
 54 of  $R^2$  in the number of parameters, and remains the same in the runtime (SGD steps).

55 **NTK Convergence** For weights  $(W, \mathbf{u})$  and  $\mathbf{x} \in \mathbb{S}^{d-1}$  we denote by  $\Psi_{W,\mathbf{u}}(\mathbf{x}) \in \mathbb{R}^{2q \times d}$  the  
 56 gradient, w.r.t. the hidden weights  $W$ , of  $h_{W,\mathbf{u}}(\mathbf{x})$ . (A slight variant of) The NTK at  $W$  is

$$k_W(\mathbf{x}, \mathbf{y}) = \frac{\langle \Psi_{W,\mathbf{u}}(\mathbf{x}), \Psi_{W,\mathbf{u}}(\mathbf{y}) \rangle}{2qB^2}$$

57 And the expected initial NTK is  $k(\mathbf{x}, \mathbf{y}) = \mathbb{E}_W k_W(\mathbf{x}, \mathbf{y})$  Our main technical contribution is near  
 58 optimal analysis of the rate (in terms of the size of the network) in which  $k_W$  converges to  $k$ .  
 59 Specifically, we show that for any  $O(1)$ -bounded distribution, and every function  $f : \mathbb{R}^d \rightarrow \mathbb{R}$  in the  
 60 kernel space  $\mathcal{H}_k$  corresponding to  $k$ , there is a function  $\hat{f}$  in the kernel space  $\mathcal{H}_{k_W}$  corresponding to  
 61  $k_W$  such that

$$\mathbb{E}_{\mathbf{x} \sim \mathcal{D}} (f(x) - \hat{f}(x))^2 = O\left(\frac{\|f\|_k^2}{dq}\right)$$

62 Here,  $\|\cdot\|_k$  denotes the kernel norm of  $f$ . The proof of the aforementioned result is based on a  
 63 new analysis of *vector* random feature schemes. While standard analysis of random feature schemes  
 64 would lead to a bound of the form  $\mathbb{E}_{\mathbf{x} \sim \mathcal{D}} (f(x) - \hat{f}(x))^2 = O\left(\frac{\|f\|_k^2}{q}\right)$ , our new analysis show that  
 65 for  $O(1)$ -bounded distributions, a factor of the input dimension  $d$  can be saved.

66 As mentioned above, we utilize our result for NTK convergence to prove various learnability results  
 67 for SGD on depth two networks.

68 **Memorization** In the problem of memorization, we consider SGD training on top of a sample  
 69  $S = \{(\mathbf{x}_1, y_1), \dots, (\mathbf{x}_m, y_m)\}$ . The goal is to understand how large the networks should be, and (to  
 70 somewhat lesser extent) how many SGD steps are needed in order to memorize  $1 - \epsilon$  fraction of  
 71 the examples, where an example is considered memorized if  $y_i h(\mathbf{x}_i) > 0$  for the output function  $h$ .  
 72 Many results assumes that the points are random or “look like random” in some sense.

73 In order to memorize even just slightly more than half of the  $m$  examples we need a network with at  
 74 least  $m$  parameters (up to poly-log factors). However, unless  $m \leq d$  (in which case the points are  
 75 linearly separable), best known results require much more than  $m$  parameters, and the current state of  
 76 the art results [23, 19] require  $m^2$  parameters. We show that if the points are sampled uniformly at  
 77 random from  $\mathbb{S}^{d-1}$ , and the labels are random, then *any fraction* of the examples can be memorized  
 78 by a network with  $\tilde{O}(m)$  parameters, and  $\tilde{O}\left(\frac{m}{\epsilon^2}\right)$  SGD iterations. Our result is valid for the hinge  
 79 loss, and most popular activation functions, including the ReLU.

80 **Learning Polynomials** For the sake of clarity, we will describe our result for learning even poly-  
 81 nomials, with ReLU networks, and the loss being the logistic loss or the hinge loss. Fix a constant  
 82 integer  $c > 0$  and consider the class of even polynomials of degree  $\leq c$  and coefficient vector norm at  
 83 most  $M$ . Namely,  $\mathcal{P}_c^M = \left\{ p(\mathbf{x}) = \sum_{|\alpha| \text{ is even and } \leq c} a_\alpha \mathbf{x}^\alpha : \sum_{|\alpha| \text{ is even and } \leq c} a_\alpha^2 \leq M^2 \right\}$  where for  
 84  $\alpha \in \{0, 1, 2, \dots\}^d$  and  $\mathbf{x} \in \mathbb{R}^d$  we denote  $\mathbf{x}^\alpha = \prod_{i=1}^d x_i^{\alpha_i}$  and  $|\alpha| = \sum_{i=1}^d \alpha_i$ . Learning the class  
 85  $\mathcal{P}_c^M$  requires a network with at least  $\Omega(M^2)$  parameters (and this remains true even if we restrict  
 86 to  $O(1)$ -bounded distributions). We show that for  $O(1)$ -bounded distributions, SGD learns  $\mathcal{P}_c^M$ ,  
 87 with error parameter  $\epsilon$  (that is, it returns a predictor with error  $\leq \epsilon$ ), using a network with  $\tilde{O}\left(\frac{M^2}{\epsilon^2}\right)$   
 88 parameters and  $O\left(\frac{M^2}{\epsilon^2}\right)$  SGD iterations.

89 **Learning Kernel Spaces** Our result for polynomials is a corollary of a more general result about  
 90 learning certain kernel spaces, that we describe next. Our result about memorization is not a direct  
 91 corollary, but is also a refinement of that result. We consider the kernel  $k : \mathbb{S}^{d-1} \times \mathbb{S}^{d-1} \rightarrow \mathbb{R}$  given  
 92 by

$$k(\mathbf{x}, \mathbf{y}) = \langle \mathbf{x}, \mathbf{y} \rangle \cdot \mathbb{E}_{\mathbf{w} \sim \mathcal{N}(I, 0)} \sigma'(\langle \mathbf{w}, \mathbf{x} \rangle, \langle \mathbf{w}, \mathbf{y} \rangle) \quad (1)$$

93 which is a variant of the Neural Tangent Kernel [16]. We show that for  $O(1)$ -bounded distributions,  
 94 SGD learns functions with norm  $\leq M$  in the corresponding kernel space, with error parameter  $\epsilon$ ,  
 95 using a network with  $\tilde{O}\left(\frac{M^2}{\epsilon^2}\right)$  parameters and  $O\left(\frac{M^2}{\epsilon^2}\right)$  SGD iterations. We note that the network  
 96 size is optimal up to the dependency on  $\epsilon$  and poly-log factors, and the number of iteration is optimal  
 97 up to a constant factor. This result is valid for most Lipschitz losses including the hinge loss and the  
 98 log-loss, and for most popular activation functions, including the ReLU.

## 99 1.1 Related Work

100 The connection between networks, kernels and random features has a long history. Early work  
 101 includes [25, 21]. In recent years, this connection was utilized to analyze neural networks algorithm  
 102 (e.g. [3, 9, 7, 6, 17, 28, 18, 10, 4, 23, 19, 13]). In fact, the vast majority of known non-linear learnable  
 103 models, including memorization models, polynomials, and kernel spaces utilize this connection. It is  
 104 worth mentioning very recent papers [8, 27, 1, 14] that proves learnability beyond NTK.

105 It is hard to quantitatively compare the various result about learning polynomials and kernels, as  
 106 they often depend on various parameters of the distributions, and talk about different kernels and  
 107 polynomial spaces. Yet, to the best of our knowledge, in none of the known results the network size  
 108 is optimal in both the input dimension and the kernel norm as theorems 5 and 6. In this regard, we  
 109 would like to mention Ji and Telgarsky [17] which has optimal (logarithmic) dependence on  $\epsilon$  in the  
 110 case that the input distribution is realizable with margin in the NTK space. This should be compared  
 111 to our dependence which is on one hand quadratic in  $1/\epsilon$ , but on the other hand valid for both the  
 112 realizable and un-realizable settings.

113 As for memorization results, as mentioned above, results with about near optimal network size either  
 114 consider linearly separable data [5] or quadratic activation [13]. As for non-polynomial activations  
 115 and non-linearly-separable data, the results of Daniely [7] imply that under rather mild conditions,  $m$   
 116 points with arbitrary labels can be memorized by networks of size  $\text{poly}(m)$ , but without an exact  
 117 specification of the exponent of the polynomial. Allen-Zhu et al. [2] showed a memorization result  
 118 using  $\tilde{O}(m^{24})$  parameters. Zou and Gu [28] improved the bound to  $\tilde{O}(m^8)$ , then to  $\tilde{O}(m^6)$  by Du  
 119 et al. [10] and Wu et al. [26], to  $\tilde{O}(m^4)$  by Du et al. [11], and finally, the state of the art until our work  
 120 was memorization with  $\tilde{O}(m^2)$  parameters [23, 20]. We would also like to mention Fiat et al. [12]

121 whose result shares some ideas with our proof. In their paper it is shown that for the ReLU activation,  
 122 linear optimization over the embedding  $\Psi_{W,\mathbf{u}}$  can memorize  $m$  points with  $\tilde{O}(m)$  parameters.

## 123 2 Preliminaries

### 124 2.1 Notation

125 We denote vectors by bold-face letters (e.g.  $\mathbf{x}$ ), matrices by upper case letters (e.g.  $W$ ), and collection  
 126 of matrices by bold-face upper case letters (e.g.  $\mathbf{W}$ ). We denote the  $i$ 's row in a matrix  $W$  by  $\mathbf{w}_i$ .  
 127 The  $p$ -norm of  $\mathbf{x} \in \mathbb{R}^d$  is denoted by  $\|\mathbf{x}\|_p = \left(\sum_{i=1}^d |x_i|^p\right)^{\frac{1}{p}}$ , and for a matrix  $W$ ,  $\|W\|$  is the  
 128 spectral norm  $\|W\| = \max_{\|\mathbf{x}\|=1} \|W\mathbf{x}\|$ . We will also use the convention that  $\|\mathbf{x}\| = \|\mathbf{x}\|_2$ . For a  
 129 distribution  $\mathcal{D}$  on a space  $\mathcal{X}$ ,  $p \geq 1$  and  $f : \mathcal{X} \rightarrow \mathbb{R}$  we denote  $\|f\|_{p,\mathcal{D}} = (\mathbb{E}_{x \sim \mathcal{D}} |f(x)|^p)^{\frac{1}{p}}$ . We  
 130 denote by  $L^2(\mathcal{X}, \mathbb{R}^d)$  the space of functions  $f : \mathcal{X} \rightarrow \mathbb{R}^d$  with  $\mathbb{E}_{x \sim \mathcal{D}} \|f(x)\|^2 < \infty$ . Note that it is  
 131 an inner product space w.r.t. the inner product  $\langle f, g \rangle_{L^2(\mathcal{X}, \mathbb{R}^d)} = \mathbb{E}_{x \sim \mathcal{D}} \langle f(x), g(x) \rangle$ . We use  $\tilde{O}$  to  
 132 hide poly-log factors.

### 133 2.2 Supervised learning

134 The goal in supervised learning is to devise a mapping from the input space  $\mathcal{X}$  to an output space  
 135  $\mathcal{Y}$  based on a sample  $S = \{(\mathbf{x}_1, y_1), \dots, (\mathbf{x}_m, y_m)\}$ , where  $(\mathbf{x}_i, y_i) \in \mathcal{X} \times \mathcal{Y}$  drawn i.i.d. from  
 136 a distribution  $\mathcal{D}$  over  $\mathcal{X} \times \mathcal{Y}$ . In our case, the instance space will always be  $\mathbb{S}^{d-1}$ . A supervised  
 137 learning problem is further specified by a loss function  $\ell : \mathbb{R} \times \mathcal{Y} \rightarrow [0, \infty)$ , and the goal is to find  
 138 a predictor  $h : \mathcal{X} \rightarrow \mathbb{R}$  whose loss,  $\mathcal{L}_{\mathcal{D}}(h) := \mathbb{E}_{(\mathbf{x}, y) \sim \mathcal{D}} \ell(h(\mathbf{x}), y)$ , is small. The *empirical* loss  
 139  $\mathcal{L}_S(h) := \frac{1}{m} \sum_{i=1}^m \ell(h(\mathbf{x}_i), y_i)$  is commonly used as a proxy for the loss  $\mathcal{L}_{\mathcal{D}}$ . When  $h$  is defined  
 140 by a vector  $\mathbf{w}$  of parameters, we will use the notations  $\mathcal{L}_{\mathcal{D}}(\mathbf{w}) = \mathcal{L}_{\mathcal{D}}(h)$ ,  $\mathcal{L}_S(\mathbf{w}) = \mathcal{L}_S(h)$  and  
 141  $\ell_{(\mathbf{x}, y)}(\mathbf{w}) = \ell(h(\mathbf{x}), y)$ . For a class  $\mathcal{H}$  of predictors from  $\mathcal{X}$  to  $\mathbb{R}$  we denote  $\mathcal{L}_{\mathcal{D}}(\mathcal{H}) = \inf_{h \in \mathcal{H}} \mathcal{L}_{\mathcal{D}}(h)$   
 142 and  $\mathcal{L}_S(\mathcal{H}) = \inf_{h \in \mathcal{H}} \mathcal{L}_S(h)$

143 A loss  $\ell$  is  $L$ -Lipschitz if for all  $y \in \mathcal{Y}$ , the function  $\ell_y(\hat{y}) := \ell(\hat{y}, y)$  is  $L$ -Lipschitz. Likewise, it is  
 144 convex if  $\ell_y$  is convex for every  $y \in \mathcal{Y}$ . We say that  $\ell$  is  $L$ -*decent* if for every  $y \in \mathcal{Y}$ ,  $\ell_y$  is convex,  
 145  $L$ -Lipschitz, and twice differentiable in all but finitely many points.

### 146 2.3 Neural network learning

147 We will consider fully connected neural networks of depth 2 with  $2q$  hidden neurons and activation  
 148 function  $\sigma : \mathbb{R} \rightarrow \mathbb{R}$ . Throughout, we assume that the activation function is continuous, is twice  
 149 differentiable in all but finitely many points, and there is  $M > 0$  such that  $|\sigma'(x)|, |\sigma''(x)| \leq M$   
 150 for every point  $x \in \mathbb{R}$  for which  $f$  is twice differentiable in  $x$ . We call such an activation a *decent*  
 151 activation. This includes most popular activations, including the ReLU activation  $\sigma(x) = \max(0, x)$ ,  
 152 as well as most sigmoids.

153 Denote  $\mathcal{N}_{d,q}^{\sigma} = \{h_{\mathbf{W}}^{\sigma}(\mathbf{x}) = \langle \mathbf{u}, \sigma(W\mathbf{x}) \rangle : W \in M_{2q,d}, \mathbf{u} \in \mathbb{R}^{2q}\}$ . We also denote by  $\mathbf{W} = (W, \mathbf{u})$   
 154 the aggregation of all weights. We next describe the learning algorithm that we analyze in this paper.  
 155 We will use a variant of the popular Xavier initialization [15] for the network weights, which we  
 156 call *Xavier initialization with zero outputs*. The neurons will be arranged in pairs, where each pair  
 157 consists of two neurons that are initialized identically, up to sign. Concretely, the weight matrix  $W$   
 158 will be initialized to be a duplication  $W = \begin{bmatrix} W' \\ W' \end{bmatrix}$  of a matrix  $W'$  of standard Gaussians<sup>2</sup> and  $\mathbf{u}$  will  
 159 be a duplication of the all- $B$  vector in dimension  $q$ , for some  $B > 0$ , with its negation. We denote  
 160 the distribution of this initialization scheme by  $\mathcal{I}(d, q, B)$ . Note that if  $\mathbf{W} \sim \mathcal{I}(d, q, B)$  then w.p. 1,  
 161  $\forall \mathbf{x}, h_{\mathbf{W}}(\mathbf{x}) = 0$ . Finally, the training algorithm is described in 1.

<sup>2</sup>It is more standard to assume that the instances has  $L^2$  norm  $O(\sqrt{d})$ , or infinity norm  $O(1)$ , and the entries of  $W'$  has variance  $\frac{1}{d}$ . For the sake of notational convenience we chose a different scaling—divided the instances by  $\sqrt{d}$  and accordingly multiplied the initial matrix by  $\sqrt{d}$ . Identical results can be derived for the more standard convention.

---

**Algorithm 1** Neural Network Training

---

**Input:** Network parameters  $\sigma$  and  $d, q$ , loss  $\ell$ , initialization parameter  $B > 0$ , learning rate  $\eta > 0$ , batch size  $b$ , number of steps  $T > 0$ , access to samples from a distribution  $\mathcal{D}$   
Sample  $\mathbf{W}^1 \sim \mathcal{I}(d, q, B)$   
**for**  $t = 1, \dots, T$  **do**  
    Obtain a mini-batch  $S_t = \{(\mathbf{x}_i^t, y_i^t)\}_{i=1}^b \sim \mathcal{D}^b$   
    With back-propagation, calculate a stochastic gradient  $\nabla \mathcal{L}_{S_t}(\mathbf{W}^t)$  and update  $\mathbf{W}^{t+1} = \mathbf{W}^t - \eta \nabla \mathcal{L}_{S_t}(\mathbf{W}^t)$   
**end for**  
Choose  $t \in [T]$  uniformly at random and return  $\mathbf{W}_t$

---

162 **2.4 Kernel spaces**

163 Let  $\mathcal{X}$  be a set. A *kernel* is a function  $k : \mathcal{X} \times \mathcal{X} \rightarrow \mathbb{R}$  such that for every  $x_1, \dots, x_m \in \mathcal{X}$  the matrix  
164  $\{k(x_i, x_j)\}_{i,j}$  is positive semi-definite. A *kernel space* is a Hilbert space  $\mathcal{H}$  of functions from  $\mathcal{X}$  to  
165  $\mathbb{R}$  such that for every  $x \in \mathcal{X}$  the linear functional  $f \in \mathcal{H} \mapsto f(x)$  is bounded. The following theorem  
166 describes a one-to-one correspondence between kernels and kernel spaces.

167 **Theorem 1.** *For every kernel  $k$  there exists a unique kernel space  $\mathcal{H}_k$  such that for every  $x, x' \in \mathcal{X}$ ,*  
168  *$k(x, x') = \langle k(\cdot, x), k(\cdot, x') \rangle_{\mathcal{H}_k}$ . Likewise, for every kernel space  $\mathcal{H}$  there is a kernel  $k$  for which*  
169  *$\mathcal{H} = \mathcal{H}_k$ .*

170 We denote the norm and inner product in  $\mathcal{H}_k$  by  $\|\cdot\|_k$  and  $\langle \cdot, \cdot \rangle_k$ . The following theorem describes a  
171 tight connection between kernels and embeddings of  $X$  into Hilbert spaces.

172 **Theorem 2.** *A function  $k : \mathcal{X} \times \mathcal{X} \rightarrow \mathbb{R}$  is a kernel if and only if there exists a mapping  $\Psi : \mathcal{X} \rightarrow \mathcal{H}$*   
173 *to some Hilbert space for which  $k(x, x') = \langle \Psi(x), \Psi(x') \rangle_{\mathcal{H}}$ . In this case,  $\mathcal{H}_k = \{f_{\Psi, \mathbf{v}} \mid \mathbf{v} \in \mathcal{H}\}$*   
174 *where  $f_{\Psi, \mathbf{v}}(x) = \langle \mathbf{v}, \Psi(x) \rangle_{\mathcal{H}}$ . Furthermore,  $\|f\|_k = \min\{\|\mathbf{v}\|_{\mathcal{H}} : f_{\Psi, \mathbf{v}}\}$  and the minimizer is*  
175 *unique.*

176 For a kernel  $k$  and  $M > 0$  we denote  $\mathcal{H}_k^M = \{h \in \mathcal{H}_k : \|h\|_k \leq M\}$ . We note that spaces of the  
177 form  $\mathcal{H}_k^M$  often form a benchmark for learning algorithms.

178 **2.5 The Neural Tangent Kernel**

179 Fix network parameters  $\sigma, d, q$  and  $B$ . The *neural tangent kernel* corresponding to weights  $\mathbf{W}$  is<sup>3</sup>

$$\text{tk}_{\mathbf{W}}(\mathbf{x}, \mathbf{y}) = \frac{\langle \nabla_{\mathbf{W}} h_{\mathbf{W}}(\mathbf{x}), \nabla_{\mathbf{W}} h_{\mathbf{W}}(\mathbf{y}) \rangle}{2qB^2}$$

180 The neural tangent kernel space,  $\mathcal{H}_{\text{tk}_{\mathbf{W}}}$ , is a linear approximation of the trajectories in which  $h_{\mathbf{W}}$   
181 changes by changing  $W$  a bit. Specifically,  $h \in \mathcal{H}_{\text{tk}_{\mathbf{W}}}$  if and only if there is  $\mathbf{U}$  such that

$$\forall \mathbf{x} \in \mathbb{S}^{d_1-1}, \quad h(\mathbf{x}) = \lim_{\epsilon \rightarrow 0} \frac{h_{\mathbf{W}+\epsilon \mathbf{U}}(\mathbf{x}) - h_{\mathbf{W}}(\mathbf{x})}{\epsilon} \quad (2)$$

182 Furthermore, we have that  $\sqrt{q}B \cdot \|h\|_{\text{tk}_{\mathbf{W}}}$  is the minimal Euclidean norm of  $\mathbf{U}$  that satisfies equation  
183 (2). The *expected initial neural tangent kernel* is

$$\text{tk}_{\sigma, B}(\mathbf{x}, \mathbf{y}) = \text{tk}_{\sigma, d, q, B}(\mathbf{x}, \mathbf{y}) = \mathbb{E}_{\mathbf{W} \sim (d, q, B)} \text{tk}_{\mathbf{W}}(\mathbf{x}, \mathbf{y})$$

184 We will later see that  $\text{tk}_{\sigma, d, q, B}$  depends only on  $\sigma$  and  $B$ . If the network is large enough, we can  
185 expect that at the onset of the optimization process,  $\text{tk}_{\sigma, B} \approx k_{\mathbf{W}}$ . Hence, approximately,  $\mathcal{H}_{\text{tk}_{\sigma, B}}$   
186 consists of the directions in which the initial function computed by the network can move. Since  
187 the initial function (according to Xavier initialization with zero outputs) is 0,  $\mathcal{H}_{\text{tk}_{\sigma, B}}$  is a linear  
188 approximation of the space of functions computed by the network in the vicinity of the initial weights.  
189 NTK theory based of the fact close enough to the initialization point, the linear approximation is  
190 good, and hence SGD on NN can learn functions in  $\mathcal{H}_{\text{tk}_{\sigma, B}}$  that has sufficiently small norm. The  
191 main question is how small should the norm be, or alternatively, how large should the network be.

---

<sup>3</sup>The division by  $2qB^2$  is for notational convenience.

192 We next derive a formula for  $\text{tk}_{\sigma, B}$ . We have, for  $\mathbf{W} \sim \mathcal{I}(d, q, B)$

$$\begin{aligned} \text{tk}_{\mathbf{W}}(\mathbf{x}, \mathbf{y}) &= \frac{\langle \nabla_{\mathbf{W}} h_{\mathbf{W}}(\mathbf{x}), \nabla_{\mathbf{W}} h_{\mathbf{W}}(\mathbf{y}) \rangle}{2qB^2} \\ &= \frac{1}{qB^2} \sum_{i=1}^q \langle B\sigma'(\langle \mathbf{w}_i, \mathbf{x} \rangle) \mathbf{x}, B\sigma'(\langle \mathbf{w}_i, \mathbf{y} \rangle) \mathbf{y} \rangle + \frac{1}{qB^2} \sum_{i=1}^q \sigma(\langle \mathbf{w}_i, \mathbf{x} \rangle) \sigma(\langle \mathbf{w}_i, \mathbf{y} \rangle) \\ &= \frac{\langle \mathbf{x}, \mathbf{y} \rangle}{q} \sum_{i=1}^q \sigma'(\langle \mathbf{w}_i, \mathbf{x} \rangle) \sigma'(\langle \mathbf{w}_i, \mathbf{y} \rangle) + \frac{1}{qB^2} \sum_{i=1}^q \sigma(\langle \mathbf{w}_i, \mathbf{x} \rangle) \sigma(\langle \mathbf{w}_i, \mathbf{y} \rangle) \end{aligned}$$

193 Taking expectation we get

$$\text{tk}_{\sigma, B}(\mathbf{x}, \mathbf{y}) = \langle \mathbf{x}, \mathbf{y} \rangle \hat{\sigma}'(\langle \mathbf{x}, \mathbf{y} \rangle) + \frac{1}{B^2} \hat{\sigma}(\langle \mathbf{x}, \mathbf{y} \rangle) = \langle \mathbf{x}, \mathbf{y} \rangle k_{\sigma'}(\mathbf{x}, \mathbf{y}) + \frac{1}{B^2} k_{\sigma}(\mathbf{x}, \mathbf{y})$$

194 Finally, we decompose the expected initial neural tangent kernel into two kernels, that corresponds to  
195 the hidden and output weights respectively. Namely, we let

$$\text{tk}_{\sigma, B} = \text{tk}_{\sigma, B}^h + \text{tk}_{\sigma, B}^o \text{ for } \text{tk}_{\sigma}^h(\mathbf{x}, \mathbf{y}) = \langle \mathbf{x}, \mathbf{y} \rangle \hat{\sigma}'(\langle \mathbf{x}, \mathbf{y} \rangle) \text{ and } \text{tk}_{\sigma, B}^o(\mathbf{x}, \mathbf{y}) = \frac{1}{B^2} \hat{\sigma}(\langle \mathbf{x}, \mathbf{y} \rangle)$$

196 Accordingly, we denote

$$\text{tk}_{\mathbf{W}}^h(\mathbf{x}, \mathbf{y}) = \frac{\langle \mathbf{x}, \mathbf{y} \rangle}{q} \sum_{i=1}^q \sigma'(\langle \mathbf{w}_i, \mathbf{x} \rangle) \sigma'(\langle \mathbf{w}_i, \mathbf{y} \rangle) \text{ and } \text{tk}_{\mathbf{W}}^o(\mathbf{x}, \mathbf{y}) = \frac{1}{qB^2} \sum_{i=1}^q \sigma(\langle \mathbf{w}_i, \mathbf{x} \rangle) \sigma(\langle \mathbf{w}_i, \mathbf{y} \rangle)$$

## 197 2.6 Vector Random Feature Schemes

198 Random features schemes [25, 21] introduced as a mean for developing fast algorithm for learning  
199 kernel spaces. Here, we will use random features as a tool for analyzing SGD on networks. Let  $\mathcal{X}$  be  
200 a measurable space and let  $k : \mathcal{X} \times \mathcal{X} \rightarrow \mathbb{R}$  be a kernel. A *random features scheme* (RFS) for  $k$  is a  
201 pair  $(\psi, \mu)$  where  $\mu$  is a probability measure on a measurable space  $\Omega$ , and  $\psi : \Omega \times \mathcal{X} \rightarrow \mathbb{R}^d$  is a  
202 measurable function such that

$$\forall \mathbf{x}, \mathbf{x}' \in \mathcal{X}, \quad k(\mathbf{x}, \mathbf{x}') = \mathbb{E}_{\omega \sim \mu} [\langle \psi(\omega, \mathbf{x}), \psi(\omega, \mathbf{x}') \rangle]. \quad (3)$$

203 We often refer to  $\psi$  (rather than  $(\psi, \mu)$ ) as the RFS. Our motivation from considering vector RFS in  
204 this paper steams from the *NTK RFS*, which is given by the mapping  $\psi : \mathbb{R}^d \times \mathbb{S}^{d-1} \rightarrow \mathbb{R}^d$  defined  
205 by  $\psi(\omega, \mathbf{x}) = \sigma'(\langle \omega, \mathbf{x} \rangle) \mathbf{x}$  and  $\mu$  being the standard Gaussian measure on  $\mathbb{R}^d$ . Note that it is an RFS  
206 for the kernel  $\text{tk}_{\sigma}^h$  (see section 2.5).

207 We define the *norm* of  $\psi$  as  $\|\psi\| = \sup_{\omega, \mathbf{x}} \|\psi(\omega, \mathbf{x})\|$ . We say that  $\psi$  is *C-bounded* if  $\|\psi\| \leq C$ . We  
208 say that an RFS  $\psi : \Omega \times \mathbb{S}^{d-1} \rightarrow \mathbb{R}^d$  is *factorized* if there is a function  $\psi' : \Omega \times \mathbb{S}^{d-1} \rightarrow \mathbb{R}$  such that  
209  $\psi(\omega, \mathbf{x}) = \psi'(\omega, \mathbf{x}) \mathbf{x}$ . We note that the NTK RFS is factorized and *C-bounded* for  $C = \|\sigma'\|_{\infty}$ .

210 Fix a *C-bounded* RFS  $\psi$  for a kernel  $k$ . A random *q-embedding* generated from  $\psi$  is the random  
211 mapping  $\Psi_{\omega}(\mathbf{x}) := \frac{(\psi(\omega_1, \mathbf{x}), \dots, \psi(\omega_q, \mathbf{x}))}{\sqrt{q}}$ , where  $\omega_1, \dots, \omega_q \sim \mu$  are i.i.d. The random *q-kernel*  
212 corresponding to  $\Psi_{\omega}$  is  $k_{\omega}(\mathbf{x}, \mathbf{x}') = \langle \Psi_{\omega}(\mathbf{x}), \Psi_{\omega}(\mathbf{x}') \rangle$ . Likewise, the random *q-kernel space*  
213 corresponding to  $\Psi_{\omega}$  is  $\mathcal{H}_{k_{\omega}}$ . We note that in the case of the NTK RFS, a random *q-embedding* is,  
214 up to scaling, the gradient of a randomly initialized network. Likewise,  $\text{tk}_{\mathbf{W}}^h$  is a random *q-kernel*  
215 generated from the NTK RFS.

216 It would be useful to consider the embedding

$$\mathbf{x} \mapsto \Psi^{\mathbf{x}} \text{ where } \Psi^{\mathbf{x}} := \psi(\cdot, \mathbf{x}) \in L^2(\Omega, \mathbb{R}^d). \quad (4)$$

217 From (3) it holds that for any  $\mathbf{x}, \mathbf{x}' \in \mathcal{X}$ ,  $k(\mathbf{x}, \mathbf{x}') = \left\langle \Psi^{\mathbf{x}}, \Psi^{\mathbf{x}'} \right\rangle_{L^2(\Omega)}$ . In particular, from Theorem 2,  
218 for every  $f \in \mathcal{H}_k$  there is a unique function  $\check{f} \in L^2(\Omega, \mathbb{R}^d)$  such that

$$\|\check{f}\|_{L^2(\Omega)} = \|f\|_k \quad (5)$$

219 and for every  $\mathbf{x} \in \mathcal{X}$ ,

$$f(\mathbf{x}) = \langle \check{f}, \Psi^{\mathbf{x}} \rangle_{L^2(\Omega, \mathbb{R}^d)} = \mathbb{E}_{\omega \sim \mu} \langle \check{f}(\omega), \psi(\omega, \mathbf{x}) \rangle. \quad (6)$$

220 Let us denote  $f_{\omega}(\mathbf{x}) = \frac{1}{q} \sum_{i=1}^q \langle \check{f}(\omega_i), \psi(\omega_i, \mathbf{x}) \rangle$ . From (6) we have that  $\mathbb{E}_{\omega} [f_{\omega}(\mathbf{x})] = f(\mathbf{x})$ .  
 221 Furthermore, for every  $\mathbf{x}$ , the variance of  $f_{\omega}(\mathbf{x})$  is at most

$$\frac{1}{q} \mathbb{E}_{\omega \sim \mu} |\langle \check{f}(\omega), \psi(\omega, \mathbf{x}) \rangle|^2 \leq \frac{C^2}{q} \mathbb{E}_{\omega \sim \mu} |\check{f}(\omega)|^2 = \frac{C^2 \|f\|_k^2}{q}.$$

222 An immediate consequence is the following corollary.

223 **Corollary 3** (Function Approximation). *For all  $\mathbf{x} \in \mathcal{X}$ ,  $\mathbb{E}_{\omega} |f(\mathbf{x}) - f_{\omega}(\mathbf{x})|^2 \leq \frac{C^2 \|f\|_k^2}{q}$ .*

224 Now, if  $\mathcal{D}$  is a distribution on  $\mathcal{X}$  we get that

$$\mathbb{E}_{\omega} \|f - f_{\omega}\|_{2, \mathcal{D}} \stackrel{\text{Jensen}}{\leq} \sqrt{\mathbb{E}_{\omega} \|f - f_{\omega}\|_{2, \mathcal{D}}^2} = \sqrt{\mathbb{E}_{\mathbf{x} \sim \mathcal{D}} \mathbb{E}_{\omega} |f(\mathbf{x}) - f_{\omega}(\mathbf{x})|^2} = \sqrt{\mathbb{E}_{\mathbf{x} \sim \mathcal{D}} \mathbb{E}_{\omega} |f(\mathbf{x}) - f_{\omega}(\mathbf{x})|^2} \leq \frac{C \|f\|_k}{\sqrt{q}}$$

225 Using the above inequality, it is possible to show that (see theorem 10 below) SGD on top of a random  
 226  $q$ -embedding, using a convex and Lipschitz loss, is guaranteed to find a function  $\hat{f}$  that satisfies  
 227  $\mathbb{E} \mathcal{L}_{\mathcal{D}}(\hat{f}) \leq \mathcal{L}_{\mathcal{D}}(f^*) + O\left(\frac{\|f^*\|_k}{\sqrt{q}}\right)$  for any  $f^* \in \mathcal{H}_k$ .

## 228 3 Results

229 We next present our results in detail. Due to lack of space, all proofs are deferred to the appendix.

### 230 3.1 Vector RFS and NTK Convergence

231 Fix a  $C$ -bounded RFS  $\psi : \Omega \times \mathcal{X} \rightarrow \mathbb{R}^d$  for a kernel  $k$ . Corollary 3 implies that  $O\left(\frac{\|f\|_k^2}{\epsilon^2}\right)$  random  
 232 features suffices to guarantee that for every  $f \in \mathcal{H}_k$ , in expectation, the empirical kernel space  
 233 will contain an  $\epsilon$  approximation of  $f$ . This bound does not depend on  $d$ , the dimension of a single  
 234 random feature. We might expect that at least in some cases,  $d$ -dimensional random feature is as  
 235 good as  $d$  one-dimensional random features. The next result show that for factorized RFS and  $O(1)$ -  
 236 bounded distributions this is indeed the case and  $O\left(\frac{\|f\|_k^2}{d\epsilon^2}\right)$  random features suffices to guarantee  
 237  $\epsilon$ -approximation.

238 **Theorem 4.** *Assume that  $\psi : \Omega \times \mathbb{S}^{d-1} \rightarrow \mathbb{R}^d$  is factorized and  $\mathcal{D}$  is  $R$ -bounded distribution. Then,*

$$\mathbb{E}_{\omega} \|f - f_{\omega}\|_{2, \mathcal{D}} \leq \sqrt{\mathbb{E}_{\omega} \|f - f_{\omega}\|_{2, \mathcal{D}}^2} \leq \frac{RC \|f\|_k}{\sqrt{qd}}$$

239 *Furthermore, if  $\ell : \mathbb{S}^{d-1} \times Y \rightarrow [0, \infty)$ , is  $L$ -Lipschitz loss and  $\mathcal{D}'$  is a distribution of  $\mathbb{S}^{d-1} \times Y$   
 240 with  $R$ -bounded marginal then  $\mathbb{E}_{\omega} \mathcal{L}_{\mathcal{D}'}(f_{\omega}) \leq \mathcal{L}_{\mathcal{D}'}(f) + \frac{LRC \|f\|_k}{\sqrt{qd}}$*

241 Using the above inequality, it is possible to show that (see theorem 10 below) SGD on top of a random  
 242  $q$ -embedding, using a convex and Lipschitz loss, is guaranteed to find a function  $\hat{f}$  that satisfies  
 243  $\mathbb{E} \mathcal{L}_{\mathcal{D}}(\hat{f}) \leq \mathcal{L}_{\mathcal{D}}(f^*) + O\left(\frac{\|f^*\|_k}{\sqrt{qd}}\right)$  for any  $f^* \in \mathcal{H}_k$ . Applying this to the NTK RFS, and via further  
 244 reduction to neural network learning, we can show that a similar guarantee is valid for algorithm 1.  
 245 This is described in the next section.

### 246 3.2 Learning the neural tangent kernel space with SGD on NN

247 Fix a decent activation function  $\sigma$  and a decent loss  $\ell$ . We shows that algorithm 1 can learn the class  
 248  $\mathcal{H}_{\text{tk}_k^M}$  using a network with  $\tilde{O}\left(\frac{M^2}{\epsilon^2}\right)$  parameters and using  $O\left(\frac{M^2}{\epsilon^2}\right)$  examples. We note that unless  
 249  $\sigma$  is linear, the number of samples is optimal up to constant factor, and the number of parameters  
 250 is optimal, up to poly-log factor and the dependency on  $\epsilon$ . This remains true even if we restrict to  
 251  $O(1)$ -bounded distributions.

252 **Theorem 5.** Given  $d, M > 0, R > 0$  and  $\epsilon > 0$  there is a choice of  $q = \tilde{O}\left(\frac{M^2 R^2}{d\epsilon^2}\right)$ ,  $T = O\left(\frac{M^2}{\epsilon^2}\right)$ ,  
 253 as well as  $B > 0$  and  $\eta > 0$ , such that for every  $R$ -bounded distribution  $\mathcal{D}$  and batch size  $b$ , the  
 254 function  $h$  returned by algorithm 1 satisfies  $\mathbb{E} \mathcal{L}_{\mathcal{D}}(h) \leq \mathcal{L}_{\mathcal{D}}\left(\mathcal{H}_{\text{tk}_\sigma^h}^M\right) + \epsilon$

255 As an application, we conclude that for the ReLU activation, algorithm 1 can learn even polynomials  
 256 of bounded norm with near optimal sample complexity and network size. We denote

$$\mathcal{P}_c^M = \left\{ p(\mathbf{x}) = \sum_{|\alpha| \text{ is even and } \leq c} a_\alpha \mathbf{x}^\alpha : \sum_{|\alpha| \text{ is even and } \leq c} a_\alpha^2 \leq M^2 \right\}$$

257 For the ReLU activation  $\sigma$ , it holds that for every constant  $c$ ,  $\mathcal{P}_c^M \subset \mathcal{H}_{\text{tk}_\sigma^h}^{O(M)}$  (e.g. [9]). Theorem 5  
 258 therefore implies that

259 **Theorem 6.** Fix a constant  $c > 0$  and assume that the activation is ReLU. Given  $d, M > 0, R > 0$   
 260 and  $\epsilon > 0$  there is a choice of  $q = \tilde{O}\left(\frac{M^2 R^2}{d\epsilon^2}\right)$ ,  $T = O\left(\frac{M^2}{\epsilon^2}\right)$ , as well as  $B > 0$  and  $\eta > 0$ , such  
 261 that for every  $R$ -bounded distribution  $\mathcal{D}$  and batch size  $b$ , the function  $h$  returned by algorithm 1  
 262 satisfies  $\mathbb{E} \mathcal{L}_{\mathcal{D}}(h) \leq \mathcal{L}_{\mathcal{D}}\left(\mathcal{P}_c^M\right) + \epsilon$

263 We note that as in theorem 5, the number of samples is optimal up to constant factor, and the number  
 264 of parameters is optimal, up to poly-log factor and the dependency on  $\epsilon$ , and this remains true even if  
 265 we restrict to  $O(1)$ -bounded distributions.

### 266 3.3 Memorization

267 Theorem 5 can be applied to analyze memorization by SGD. Assume that  $\ell$  is the hinge loss (similar  
 268 result is valid for many other losses such as the log-loss) and  $\sigma$  is any decent non-linear activation.  
 269 Let  $S = \{(\mathbf{x}_1, y_1), \dots, (\mathbf{x}_m, y_m)\}$  be  $m$  random, independent and uniform points in  $\mathbb{S}^{d-1} \times \{\pm 1\}$   
 270 with  $m = d^c$  for some  $c > 1$ . Suppose that we run SGD on top of  $S$ . Namely, we run algorithm 1  
 271 where the underlying distribution is the uniform distribution on the points in  $S$ . Let  $h : \mathbb{S}^{d-1} \rightarrow \mathbb{R}$  be  
 272 the output of the algorithm. We say that the algorithm memorized the  $i$ 'th example if  $y_i h(\mathbf{x}_i) > 0$ .  
 273 The memorization problem investigate how many points the algorithm can memorize, were most of  
 274 the focus is on how large the network should be in order to memorize  $1 - \epsilon$  fraction of the points.

275 As shown in section A.5, the uniform distribution on the examples in  $S$  is  $(1 + o(1))$ -bounded w.h.p.  
 276 over the choice of  $S$ . Likewise, it is not hard to show that w.h.p. over the choice of  $S$  there is a  
 277 function  $h^* \in \mathcal{H}_k^{O(m)}$  such that  $h^*(\mathbf{x}_i) = y_i$  for all  $i$ . By theorem 5 we can conclude the by running  
 278 SGD on a network with  $\tilde{O}\left(\frac{m}{\epsilon^2}\right)$  parameters and  $O\left(\frac{m}{\epsilon^2}\right)$  steps, the network will memorize  $1 - \epsilon$   
 279 fraction of the points. This size of networks is optimal up to poly-log factors, and the dependency of  
 280  $\epsilon$ . This is satisfactory is  $\epsilon$  is considered a constant. However, for small  $\epsilon$ , more can be desired. For  
 281 instance, in the case that we want to memorize all points, we need  $\epsilon < \frac{1}{m}$ , and we get a network  
 282 with  $m^3$  parameters. To circumvent that, we perform a more refined analysis of this memorization  
 283 problem and show that even perfect memorization of  $m$  points can be done via SGD on a network  
 284 with  $\tilde{O}(m)$  parameters, which is optimal, up to poly-log factors.

285 **Theorem 7.** There is a choice of  $q = \tilde{O}\left(\frac{m}{d}\right)$ ,  $T = \tilde{O}\left(\frac{m}{\epsilon^2}\right)$ , as well as  $B > 0$  and  $\eta > 0$ , such that  
 286 for every batch size  $b$ , w.p.  $1 - o_m(1)$ , the function  $h$  returned by algorithm 1 memorizes  $1 - \epsilon$   
 287 fraction of the examples.

288 We emphasize the our result is true for any non-linear and decent activation function.

### 289 3.4 Open Questions

290 The most obvious open question is to generalize our results to the standard Xavier initialization,  
 291 where  $W$  is a matrix of independent standeard Gaussians, while  $\mathbf{u}$  is a vector of independent centered  
 292 Gaussians of variance  $\frac{1}{q}$ . Another open question is to generalize our result to deeper networks.



## References

- 293
- 294 [1] Zeyuan Allen-Zhu and Yuanzhi Li. What can resnet learn efficiently, going beyond kernels?  
295 *arXiv preprint arXiv:1905.10337*, 2019.
- 296 [2] Zeyuan Allen-Zhu, Yuanzhi Li, and Zhao Song. A convergence theory for deep learning via  
297 over-parameterization. *arXiv preprint arXiv:1811.03962*, 2018.
- 298 [3] A. Andoni, R. Panigrahy, G. Valiant, and L. Zhang. Learning polynomials with neural networks.  
299 In *Proceedings of the 31st International Conference on Machine Learning*, pages 1908–1916,  
300 2014.
- 301 [4] Sanjeev Arora, Simon S Du, Wei Hu, Zhiyuan Li, and Ruosong Wang. Fine-grained analysis  
302 of optimization and generalization for overparameterized two-layer neural networks. *arXiv*  
303 *preprint arXiv:1901.08584*, 2019.
- 304 [5] Alon Brutzkus, Amir Globerson, Eran Malach, and Shai Shalev-Shwartz. Sgd learns over-  
305 parameterized networks that provably generalize on linearly separable data. In *ICLR*, 2018.
- 306 [6] Yuan Cao and Quanquan Gu. Generalization bounds of stochastic gradient descent for wide  
307 and deep neural networks. *arXiv preprint arXiv:1905.13210*, 2019.
- 308 [7] Amit Daniely. Sgd learns the conjugate class of the network. In *NIPS*, 2017.
- 309 [8] Amit Daniely and Eran Malach. Learning parities with neural networks. *arXiv preprint*  
310 *arXiv:2002.07400*, 2020.
- 311 [9] Amit Daniely, Roy Frostig, and Yoram Singer. Toward deeper understanding of neural networks:  
312 The power of initialization and a dual view on expressivity. In *NIPS*, 2016.
- 313 [10] Simon S Du, Jason D Lee, Haochuan Li, Liwei Wang, and Xiyu Zhai. Gradient descent finds  
314 global minima of deep neural networks. *arXiv preprint arXiv:1811.03804*, 2018.
- 315 [11] Simon S Du, Jason D Lee, Haochuan Li, Liwei Wang, and Xiyu Zhai. Gradient descent finds  
316 global minima of deep neural networks. *arXiv preprint arXiv:1811.03804*, 2018.
- 317 [12] Jonathan Fiat, Eran Malach, and Shai Shalev-Shwartz. Decoupling gating from linearity. *arXiv*  
318 *preprint arXiv:1906.05032*, 2019.
- 319 [13] Rong Ge, Runzhe Wang, and Haoyu Zhao. Mildly overparametrized neural nets can memorize  
320 training data efficiently. *arXiv preprint arXiv:1909.11837*, 2019.
- 321 [14] Behrooz Ghorbani, Song Mei, Theodor Misiakiewicz, and Andrea Montanari. Limitations of  
322 lazy training of two-layers neural network. In *Advances in Neural Information Processing*  
323 *Systems*, pages 9108–9118, 2019.
- 324 [15] X. Glorot and Y. Bengio. Understanding the difficulty of training deep feedforward neural  
325 networks. In *International conference on artificial intelligence and statistics*, pages 249–256,  
326 2010.
- 327 [16] Arthur Jacot, Franck Gabriel, and Clément Hongler. Neural tangent kernel: Convergence and  
328 generalization in neural networks. In *Advances in neural information processing systems*, pages  
329 8571–8580, 2018.
- 330 [17] Ziwei Ji and Matus Telgarsky. Polylogarithmic width suffices for gradient descent to achieve  
331 arbitrarily small test error with shallow relu networks. *arXiv preprint arXiv:1909.12292*, 2019.
- 332 [18] Chao Ma, Lei Wu, et al. A comparative analysis of the optimization and generalization property  
333 of two-layer neural network and random feature models under gradient descent dynamics. *arXiv*  
334 *preprint arXiv:1904.04326*, 2019.
- 335 [19] Samet Oymak and Mahdi Soltanolkotabi. Towards moderate overparameterization: global  
336 convergence guarantees for training shallow neural networks. *arXiv preprint arXiv:1902.04674*,  
337 2019.
- 338 [20] Samet Oymak and Mahdi Soltanolkotabi. Towards moderate overparameterization: global  
339 convergence guarantees for training shallow neural networks. *arXiv:1902.04674 [cs, math,*  
340 *stat]*, February 2019. URL <http://arxiv.org/abs/1902.04674>. arXiv: 1902.04674.
- 341 [21] A. Rahimi and B. Recht. Weighted sums of random kitchen sinks: Replacing minimization  
342 with randomization in learning. In *Advances in neural information processing systems*, pages  
343 1313–1320, 2009.

- 344 [22] S. Shalev-Shwartz and S. Ben-David. *Understanding Machine Learning: From Theory to*  
345 *Algorithms*. Cambridge University Press, 2014.
- 346 [23] Zhao Song and Xin Yang. Quadratic suffices for over-parametrization via matrix chernoff  
347 bound. *arXiv preprint arXiv:1906.03593*, 2019.
- 348 [24] Roman Vershynin. Introduction to the non-asymptotic analysis of random matrices. *arXiv*  
349 *preprint arXiv:1011.3027 v7*, 2010.
- 350 [25] C.K.I. Williams. Computation with infinite neural networks. pages 295–301, 1997.
- 351 [26] Xiaoxia Wu, Simon S Du, and Rachel Ward. Global convergence of adaptive gradient methods  
352 for an over-parameterized neural network. *arXiv preprint arXiv:1902.07111*, 2019.
- 353 [27] Gilad Yehudai and Ohad Shamir. On the power and limitations of random features for under-  
354 standing neural networks. *arXiv preprint arXiv:1904.00687*, 2019.
- 355 [28] Difan Zou and Quanquan Gu. An improved analysis of training over-parameterized deep neural  
356 networks. *arXiv preprint arXiv:1906.04688*, 2019.

357 **A Proofs**

358 **A.1 More preliminaries: inner product kernels and Hermite polynomials**

359 A special type of kernels that we will use for us are *inner product kernels*. These are kernels  
 360  $k : \mathbb{S}^{d-1} \times \mathbb{S}^{d-1} \rightarrow \mathbb{R}$  of the form

$$k(\mathbf{x}, \mathbf{y}) = \sum_{n=0}^{\infty} b_n \langle \mathbf{x}, \mathbf{y} \rangle^n$$

361 For scalars  $b_n \geq 0$  with  $\sum_{n=0}^{\infty} b_n < \infty$ . It is well known that for any such sequence  $k$  is a kernel.  
 362 The following lemma summarizes a few properties of inner product kernels.

363 **Lemma 8.** *Let  $k$  be the inner product kernel  $k(\mathbf{x}, \mathbf{y}) = \sum_{n=0}^{\infty} b_n \langle \mathbf{x}, \mathbf{y} \rangle^n$ . Suppose that  $b_n > 0$*

364 1. *If  $p(\mathbf{x}) = \sum_{|\alpha|=n} a_\alpha \mathbf{x}^\alpha$  then  $p \in \mathcal{H}_k$  and furthermore  $\|p\|_k^2 \leq \frac{1}{b_n} \sum_{|\alpha|=n} a_\alpha^2$*

365 2. *For every  $\mathbf{u} \in \mathbb{S}^{d-1}$ , the function  $f(\mathbf{x}) = \langle \mathbf{u}, \mathbf{x} \rangle^n$  belongs to  $\mathcal{H}_k$  and  $\|f\|_k^2 = \frac{1}{b_n}$*

366 Hermite polynomials  $h_0, h_1, h_2, \dots$  are the sequence of orthonormal polynomials corresponding to  
 367 the standard Gaussian measure on  $\mathbb{R}$ . Fix an activation  $\sigma : \mathbb{R} \rightarrow \mathbb{R}$ . Following the terminology of [9]  
 368 we define the *dual activation* of  $\sigma$  as

$$\hat{\sigma}(\rho) = \mathbb{E}_{X, Y \text{ are } \rho\text{-correlated standard Gaussian}} \sigma(X)\sigma(Y)$$

369 It holds that if  $\sigma = \sum_{n=0}^{\infty} a_n h_n$  then

$$\hat{\sigma}(\rho) = \sum_{n=0}^{\infty} a_n^2 \rho^n$$

370 In particular,  $k_\sigma(\mathbf{x}, \mathbf{y}) := \hat{\sigma}(\langle \mathbf{x}, \mathbf{y} \rangle)$  is an inner product kernel.

371 **A.2 Vector random feature schemes**

372 For the rest of this section, let us fix a  $C$ -bounded RFS  $\psi$  for a kernel  $k$  and a random  $q$  embedding  
 373  $\Psi_\omega$ . For every  $\mathbf{x}, \mathbf{x}' \in \mathcal{X}$

$$k_\omega(\mathbf{x}, \mathbf{x}') = \frac{1}{q} \sum_{i=1}^q \langle \psi(\omega_i, \mathbf{x}), \psi(\omega_i, \mathbf{x}') \rangle$$

374 is an average of  $q$  independent random variables whose expectation is  $k(\mathbf{x}, \mathbf{x}')$ . By Hoeffding's  
 375 bound we have.

376 **Theorem 9 (Kernel Approximation).** *Assume that  $q \geq \frac{2C^4 \log(\frac{2}{\delta})}{\epsilon^2}$ , then for every  $\mathbf{x}, \mathbf{x}' \in \mathcal{X}$  we have*  
 377  $\Pr(|k_\omega(\mathbf{x}, \mathbf{x}') - k(\mathbf{x}, \mathbf{x}')| \geq \epsilon) \leq \delta$ .

378 We next discuss approximation of functions in  $\mathcal{H}_k$  by functions in  $\mathcal{H}_{k_\omega}$ , and prove theorem 3

379 *Proof.* (of theorem 4) Let  $\mathbf{x} \sim \mathcal{D}$  and  $\omega \sim \mu$ . We have

$$\begin{aligned}
\mathbb{E}_{\omega} \|f - f_{\omega}\|_{2, \mathcal{D}} &\stackrel{\text{Jensen's Inequality}}{\leq} \sqrt{\mathbb{E}_{\omega} \|f - f_{\omega}\|_{2, \mathcal{D}}^2} \\
&= \sqrt{\mathbb{E}_{\omega} \mathbb{E}_{\mathbf{x}} |f(\mathbf{x}) - f_{\omega}(\mathbf{x})|^2} \\
&= \sqrt{\mathbb{E}_{\mathbf{x}} \mathbb{E}_{\omega} |f(\mathbf{x}) - f_{\omega}(\mathbf{x})|^2} \\
&= \sqrt{\frac{\mathbb{E}_{\mathbf{x}} \mathbb{E}_{\omega \sim \mu} |\langle \check{f}(\omega), \psi(\omega, \mathbf{x}) \rangle - f(\mathbf{x})|^2}{q}} \\
&\stackrel{\text{Variance is bounded by squared } L^2 \text{ norm}}{\leq} \sqrt{\frac{\mathbb{E}_{\mathbf{x}} \mathbb{E}_{\omega \sim \mu} |\langle \check{f}(\omega), \psi(\omega, \mathbf{x}) \rangle|^2}{q}} \\
&= \sqrt{\frac{\mathbb{E}_{\omega \sim \mu} \mathbb{E}_{\mathbf{x}} |\langle \check{f}(\omega), \psi'(\omega, \mathbf{x}) \mathbf{x} \rangle|^2}{q}} \\
&\stackrel{\psi \text{ and hence also } \psi' \text{ is } C\text{-bounded}}{\leq} C \sqrt{\frac{\mathbb{E}_{\omega \sim \mu} \mathbb{E}_{\mathbf{x}} |\langle \check{f}(\omega), \mathbf{x} \rangle|^2}{q}} \\
&\stackrel{\mathcal{D} \text{ is } R\text{-bounded}}{\leq} CR \sqrt{\frac{\mathbb{E}_{\omega \sim \mu} \|\check{f}(\omega)\|^2}{qd}} \\
&\stackrel{\text{Equation (5)}}{=} \frac{CR \|f\|_k}{\sqrt{qd}}.
\end{aligned}$$

380 Finally, for  $L$ -Lipschitz  $\ell$ , and  $(\mathbf{x}, y) \sim \mathcal{D}'$  then

$$\begin{aligned}
\mathbb{E}_{\omega} L_{\mathcal{D}'}(f_{\omega}) &= \mathbb{E}_{\omega} \mathbb{E}_{\mathbf{x}, y} \ell(f_{\omega}(\mathbf{x}), y) \\
&\leq \mathbb{E}_{\omega} \mathbb{E}_{\mathbf{x}, y} \ell(f(\mathbf{x}), y) + L \mathbb{E}_{\omega} \mathbb{E}_{\mathbf{x}} |f(\mathbf{x}) - f_{\omega}(\mathbf{x})| \\
&= \mathbb{E}_{\mathbf{x}, y} \ell(f(\mathbf{x}), y) + L \mathbb{E}_{\omega} \mathbb{E}_{\mathbf{x}} |f(\mathbf{x}) - f_{\omega}(\mathbf{x})| \\
&= \mathcal{L}_{\mathcal{D}'}(f) + L \mathbb{E}_{\omega} \mathbb{E}_{\mathbf{x}} |f(\mathbf{x}) - f_{\omega}(\mathbf{x})| \\
&\stackrel{L^1 \leq L^2}{\leq} \mathcal{L}_{\mathcal{D}'}(f) + L \mathbb{E}_{\omega} \sqrt{\mathbb{E}_{\mathbf{x}} |f(\mathbf{x}) - f_{\omega}(\mathbf{x})|^2} \\
&\stackrel{\text{first part of the lemma}}{\leq} \mathcal{L}_{\mathcal{D}'}(f) + \frac{LCR \|f\|_k}{\sqrt{qd}}
\end{aligned}$$

381

□

382 We next consider an algorithm for learning  $\mathcal{H}_k$ , by running SGD on top of random features.

---

**Algorithm 2** SGD on RFS

---

**Input:** RFS  $\psi : \Omega \times \mathcal{X} \rightarrow \mathbb{R}^d$ , number of random features  $q$ , loss  $\ell$ , learning rate  $\eta > 0$ , batch size  $b$ , number of steps  $T > 0$ , access to samples from a distribution  $\mathcal{D}$

Sample  $\omega \sim \mu^q$

Initialize  $\mathbf{v}^1 = \mathbf{0} \in \mathbb{R}^{q \times d}$

**for**  $t = 1, \dots, T$  **do**

    Obtain a mini-batch  $S_t = \{(\mathbf{x}_i^t, y_i^t)\}_{i=1}^b \sim \mathcal{D}^b$

    Update  $\mathbf{v}_{t+1} = \mathbf{v}_t - \eta \nabla \mathcal{L}_{S_t}(\mathbf{v}_t)$  where  $\mathcal{L}_{S_t}(\mathbf{v}) = \mathcal{L}_{S_t}(f_{\Psi_{\omega}, \mathbf{v}})$ .

**end for**

Choose  $t \in [T]$  uniformly at random and return  $f_{\Psi_{\omega}, \mathbf{v}_t}$

---

383 **Theorem 10.** Assume that  $\psi$  is factorized and  $C$ -bounded RFS for  $k$ , that  $\ell$  is convex and  $L$ -Lipschitz,  
384 and that  $\mathcal{D}$  has  $R$ -bounded marginal. Let  $f$  be the function returned by algorithm 2. Fix a function

385  $f^* \in \mathcal{H}_k$ . Then

$$\mathbb{E} \mathcal{L}_{\mathcal{D}}(f) \leq \mathcal{L}_{\mathcal{D}}(f^*) + \frac{LRC \|f^*\|_k}{\sqrt{qd}} + \frac{\|f^*\|_k^2}{2\eta T} + \frac{\eta L^2 C^2}{2}$$

386 In particular, if  $\|f^*\|_k \leq M$  and  $\eta = \frac{M}{\sqrt{T}LC}$  we have

$$\mathbb{E} \mathcal{L}_{\mathcal{D}}(f) \leq L_{\mathcal{D}}(f^*) + \frac{LRCM}{\sqrt{qd}} + \frac{LCM}{\sqrt{T}}$$

387 *Proof.* Denote by  $\mathbf{v}^* \in \mathbb{R}^{dq}$  the vector

$$v_i^* = \frac{1}{\sqrt{q}} (\check{f}^*(\omega_1), \dots, \check{f}^*(\omega_1))$$

388 By standard results on SGD (e.g. [22]) we have that given  $\omega$ ,

$$\mathcal{L}_{\mathcal{D}}(f) \leq \mathcal{L}_{\mathcal{D}}(f_{\omega}^*) + \frac{1}{2\eta T} \|\mathbf{v}^*\|^2 + \frac{\eta L^2 C^2}{2}$$

389 Taking expectation over the choice of  $\omega$  and using theorem 4 and equation (5) we have

$$\mathcal{L}_{\mathcal{D}}(f) \leq \mathcal{L}_{\mathcal{D}}(f^*) + \frac{LRC \|f^*\|_k}{\sqrt{qd}} + \frac{\|f^*\|_k^2}{2\eta T} + \frac{\eta L^2 C^2}{2}$$

390

□

391 We conclude the section with a few calculations of  $\check{f}$ , that will be useful later.

392 **Example 11.** Fix  $\sigma : \mathbb{R} \rightarrow \mathbb{R}$  with Hermite expansion  $\sigma = \sum_{n=0}^{\infty} a_n h_n$  and let  $\Omega = \mathbb{R}^d$  and  
393  $\mathcal{X} = \mathbb{S}^{d-1}$

394 1. Consider the RFS  $\psi(\omega, \mathbf{x}) = \sigma(\langle \omega, \mathbf{x} \rangle)$  with  $\mu$  being the standard Gaussian measure on  
395  $\mathbb{R}^d$ . We have that  $\psi$  is an RFS for the kernel  $k(\mathbf{x}, \mathbf{y}) = \hat{\sigma}(\langle \mathbf{x}, \mathbf{y} \rangle)$ . Consider the function  
396  $f(\mathbf{x}) = \langle \mathbf{x}_0, \mathbf{x} \rangle^n$ . We claim that  $\check{f}(\omega) = \frac{1}{a_n} h_n(\langle \mathbf{x}_0, \omega \rangle)$ . Indeed, we have,

$$\begin{aligned} \mathbb{E}_{\omega \sim \mu} \sigma(\langle \omega, \mathbf{x} \rangle) \frac{1}{a_n} h_n(\langle \mathbf{x}_0, \omega \rangle) &= \frac{1}{a_n} \sum_{k=0}^{\infty} \mathbb{E}_{\omega \sim \mu} a_k h_k(\langle \omega, \mathbf{x} \rangle) h_n(\langle \mathbf{x}_0, \omega \rangle) \\ &= \frac{1}{a_n} \sum_{k=0}^{\infty} a_k \delta_{kn} \langle \mathbf{x}, \mathbf{x}_0 \rangle^k \\ &= \langle \mathbf{x}, \mathbf{x}_0 \rangle^n \end{aligned}$$

397 and

$$\left\| \omega \mapsto \frac{1}{a_n} h_n(\langle \mathbf{x}_0, \omega \rangle) \right\|_{L^2(\Omega)} = \mathbb{E}_{\omega \sim \mu} \frac{1}{a_n^2} h_n^2(\langle \mathbf{x}_0, \omega \rangle) = \frac{1}{a_n^2} = \|f\|_k^2$$

398 2. Consider the NTK RFS  $\psi(\omega, \mathbf{x}) = \sigma(\langle \omega, \mathbf{x} \rangle) \mathbf{x}$  with  $\mu$  being the standard Gaussian measure  
399 on  $\mathbb{R}^d$ . We have that  $\psi$  is an RFS for the kernel  $k(\mathbf{x}, \mathbf{y}) = \langle \mathbf{x}, \mathbf{y} \rangle \hat{\sigma}(\langle \mathbf{x}, \mathbf{y} \rangle)$ . Consider  
400 the function  $f(\mathbf{x}) = (\langle \mathbf{x}_0, \mathbf{x} \rangle)^n$ . As in the item above, it is not hard to show that  $\check{f}(\omega) =$   
401  $\frac{1}{a_{n-1}} h_{n-1}(\langle \mathbf{x}_0, \omega \rangle) \mathbf{x}_0$ .

### 402 A.3 Reduction of NN learning to SGD over vector random features

403 We will prove our result via a reduction to linear learning over the initial neural tangent kernel space,  
404 corresponding the the hidden weights.

405 That is, we define by  $\Psi_{\mathbf{W}}(\mathbf{x})$  the gradient of the function  $\mathbf{W} \mapsto h_{\mathbf{W}}(\mathbf{x})$  w.r.t. the hidden weights.  
406 Namely,

$$\Psi_{\mathbf{W}}(\mathbf{x}) = (u_1 \sigma'(\langle \mathbf{w}_1, \mathbf{x} \rangle) \mathbf{x}, \dots, u_{2q} \sigma'(\langle \mathbf{w}_{2q}, \mathbf{x} \rangle) \mathbf{x}) \in \mathbb{R}^{2q \times d}$$

407 Denote  $f_{\Psi_{\mathbf{W}}, \mathbf{V}}(\mathbf{x}) = \langle \mathbf{V}, \Psi_{\mathbf{W}}(\mathbf{x}) \rangle$  and consider algorithm 3.

408 It is not hard to show that by taking large enough  $B$ , algorithm 1 is essentially equivalent to algorithm  
409 3. Namely,

---

**Algorithm 3** Neural Tangent Kernel Training
 

---

**Input:** Network parameters  $\sigma$  and  $d, q$ , loss  $\ell$ , learning rate  $\eta > 0$ , batch size  $b$ , number of steps  $T > 0$ , access to samples from a distribution  $\mathcal{D}$   
 Sample  $\mathbf{W} \sim \mathcal{I}(d, q, 1)$   
 Initialize  $\mathbf{V}^1 = 0 \in \mathbb{R}^{2q \times d}$   
**for**  $t = 1, \dots, T$  **do**  
   Obtain a mini-batch  $S_t = \{(\mathbf{x}_i^t, y_i^t)\}_{i=1}^b \sim \mathcal{D}^b$   
   Using back-propagation, calculate the gradient  $\nabla$  of  $\mathcal{L}_{S_t}(\mathbf{V}) = \mathcal{L}_{S_t}(f_{\Psi_{\mathbf{W}, \mathbf{V}}})$  at  $\mathbf{V}^t$   
   Update  $\mathbf{V}^{t+1} = \mathbf{V}^t - \eta \nabla$   
**end for**  
 Choose  $t \in [T]$  uniformly at random and return  $f_{\Psi_{\mathbf{W}, \mathbf{V}_t}}$

---

410 **Lemma 12.** Fix a decent activation  $\sigma$  as well as convex a decent loss  $\ell$ . There is a choice  $B =$   
 411  $\text{poly}(d, q, 1/\eta, T, 1/\epsilon)$ , such that for every input distribution the following holds. Let  $h_1, h_2$  be the  
 412 functions returned algorithm 1 with parameters  $d, q, \frac{\eta}{B^2}, b, B, T$  and algorithm 3 with parameters  
 413  $d, q, \eta, b, T$ . Then,  $|\mathbb{E} \mathcal{L}_{\mathcal{D}}(h_1) - \mathbb{E} \mathcal{L}_{\mathcal{D}}(h_2)| < \epsilon$

414 *Proof.* (sketch) For simplicity, instead of assuming that  $\sigma$  is  $M$ -decent, we assume that the activation  
 415 is twice differentiable and satisfies  $\|\sigma'\|_{\infty}, \|\sigma''\|_{\infty} < M$ . At the end of the sketch we will later  
 416 explain how to handle  $M$ -decent activation.

417 Consider a run of algorithm 1 starting from the initial weights  $\mathbf{W} = (W, \mathbf{u})$  in the support of  
 418  $\mathcal{I}(d, q, 1)$ . Consider now another run, running on the same mini-batches, hyper-parameters and initial  
 419 weights, except that in the second run the output weight are multiplied by  $B$ , and the learning rate is  
 420 multiplied by  $\frac{1}{B^2}$ . Our goal is to show that for large  $B$ , the second run approximates algorithm 3,  
 421 with the approximation becoming better as  $B$  gets larger.

422 The process of multiplying the output weights by  $B$  cause the gradient,  $\nabla_W h_{\mathbf{W}}(x)$ , of the hidden  
 423 layer to be multiplied by  $B$ , and the gradient,  $\nabla_{\mathbf{u}} h_{\mathbf{W}}(x)$ , of the output layer to remain the same.  
 424 Thus, for large enough  $B$ , we can use this observation in order to ignore the gradient of the output  
 425 weights. We therefore assume that algorithm 1 only updates the hidden weight. Likewise, while  
 426 the gradient is multiplied by  $B$ , the step size is multiplied by  $\frac{1}{B^2}$ . Hence, the total movement is  
 427 multiplied by  $\frac{1}{B}$ . It therefore holds that the optimization process takes place in a ball of radius  $\frac{R}{B}$   
 428 around  $W$ , where  $R = \text{poly}(M, d, q, 1/\eta, T, 1/\epsilon)$  does not depend on  $B$ .

429 Now by multiplying the output weights by  $B$ , we move from the network function  $h_W(x)$  to  
 430  $\tilde{h}_W(x) := B h_W(x)$ . The first order approximation of  $\tilde{h}$  around the initial weights is

$$\tilde{h}_{W+V}(x) = B h_W(x) + B \langle \nabla_W h_W(x), V \rangle + \frac{H}{2} \|V\|^2 = B \langle \nabla_W h_W(x), V \rangle + \frac{H}{2} \|V\|^2$$

431 Where  $H$  is a uniform bound on the Hessian of  $h_W(x)$  (such a bound exists since  $\|\sigma'\|_{\infty}, \|\sigma''\|_{\infty} <$   
 432  $M$ ). Now, since the optimization in a ball of radius  $\frac{R}{B}$  around  $W$ , we can ignore the quadratic part for  
 433 large enough  $B$ , and reduce to the case of optimization over the linear function  $B \langle \nabla_W h_W(x), V \rangle$   
 434 with learning rate of  $\frac{\eta}{B^2}$  starting at 0. This is equivalent to optimization over the linear function  
 435  $\langle \nabla_W h(W, x), V \rangle$  with learning rate of  $\eta$  starting at 0, which is exactly algorithm 3.

436 Finally, to handle general  $M$ -decent activation, we note that any such activation locally satisfies,  
 437  $\|\sigma'\|_{\infty}, \|\sigma''\|_{\infty} < M$ . Now, for large enough  $B$ , the output of the hidden layer, before the activation,  
 438 barely moves throughout the optimization process, and hence, for each example in the min-batches,  
 439 we don't move between different regions in which  $\sigma$  satisfies  $\|\sigma'\|_{\infty}, \|\sigma''\|_{\infty} < M$ .

440 □

441 By lemma 11 in order to prove theorem 5 it is enough to analyze algorithm 3. Specifically, theorem 5  
 442 follows from the following theorem:

443 **Theorem 13.** Given  $d, M > 0, R > 0$  and  $\epsilon > 0$  there is a choice of  $q = \tilde{O}\left(\frac{M^2 R^2}{d \epsilon^2}\right), T = O\left(\frac{M^2}{\epsilon^2}\right),$   
 444 as well as  $\eta > 0$ , such that for every  $R$ -bounded distribution  $\mathcal{D}$  and batch size  $b$ , the function  $h$   
 445 returned by algorithm 3 satisfies  $\mathbb{E} \mathcal{L}_{\mathcal{D}}(h) \leq \mathcal{L}_{\mathcal{D}}\left(\mathcal{H}_{\text{tk}_\sigma^M}^M\right) + \epsilon$

446 Our next step is to rephrase algorithm 3 in the language of (vector) random features. We note that  
 447 algorithm 3 is SGD on top of the random embedding  $\Psi_{\mathbf{w}}$ . This embedding composed of  $q$  i.i.d.  
 448 random mappings  $\psi_{\mathbf{w}}(\mathbf{x}) = (\sigma'(\langle \mathbf{w}, \mathbf{x} \rangle) \mathbf{x}, -\sigma'(\langle \mathbf{w}, \mathbf{x} \rangle) \mathbf{x})$  where  $\mathbf{w} \in \mathbb{R}^d$  is a standard Gaussian.  
 449 This can be slightly simplified to SGD on top of the i.i.d. random mappings  $\psi_{\mathbf{w}}(\mathbf{x}) = \sigma'(\langle \mathbf{w}, \mathbf{x} \rangle) \mathbf{x}$ .  
 450 Indeed, if we make this change the inner products between the different examples, after the mapping  
 451 is applied, do not change (up to multiplication by  $\sqrt{2}$ ), and SGD only depends on these inner products.  
 452 This falls in the framework of learning with (vector) random features scheme, which we define next,  
 453 and analyze in the next section.

454 We note that since the NTK RFS is factorized and  $C$ -bounded (for  $C = \|\sigma'\|_{\infty}$ ), theorem 12 follows  
 455 from theorem 10. Together with lemma 11, this implies theorem 5.

#### 456 A.4 Memorization of random set of points – proof of theorem 7

457 Consider the NTK RFS  $\psi(\omega, \mathbf{x}) = \sigma'(\langle \omega, \mathbf{x} \rangle) \mathbf{x}$  with  $\mu$  being the standard Gaussian measure on  $\mathbb{R}^d$ .  
 458 Recall that  $\psi$  is an RFS for the kernel  $\text{tk}_{\sigma}^h(\mathbf{x}, \mathbf{y}) = \langle \mathbf{x}, \mathbf{y} \rangle \sigma'(\langle \mathbf{x}, \mathbf{y} \rangle)$ . As in the proof of theorem  
 459 5, it is enough to show that for  $q = \tilde{O}\left(\frac{m}{d}\right) = \tilde{O}(d^{c-1})$ , w.p.  $1 - o(1)$  over the choice of  $S$  and  
 460  $\omega = (\omega_1, \dots, \omega_q)$ , there is  $\mathbf{v} \in \mathbb{R}^{dq}$  such that

$$\langle \mathbf{v}, \Psi_{\omega}(\mathbf{x}_i) \rangle = y_i + o(1) \text{ for all } i \text{ and } \|\mathbf{v}\|_2^2 = \tilde{O}(m) \quad (7)$$

461 Choose a constant integer  $c' > 4c + 2$  such that  $a_{c'-1} \neq 0$ . Such a constant exists since  $\sigma$  is not a  
 462 polynomial. Define

$$f(\mathbf{x}) = \sum_{i=1}^m y_i (\langle \mathbf{x}_i, \mathbf{x} \rangle)^{c'}$$

463

464 **Lemma 14.** *With probability  $1 - \delta$  we have that*

$$f(\mathbf{x}_i) = y_i + O\left(\frac{\log^{\frac{c'}{2}}(d/\delta)}{d}\right) \text{ for all } i \text{ and } \|f\|_{k_{\sigma}}^2 = O(m) + O\left(\frac{\log^{\frac{c'}{2}}(d/\delta)}{d}\right)$$

465 *Proof.* W.p  $1 - \delta$  we have that  $\langle \mathbf{x}_i, \mathbf{x}_j \rangle \leq O\left(\sqrt{\frac{\log(m/\delta)}{d}}\right) = O\left(\sqrt{\frac{\log(d/\delta)}{d}}\right)$  for all  $i, j \in [m]$ . In  
 466 this case we have that for any  $i$

$$f(\mathbf{x}_i) = y_i + O\left(m \left(\frac{\log(d/\delta)}{d}\right)^{\frac{c'}{2}}\right) = y_i + O\left(\log^{\frac{c'}{2}}(d/\delta) d^{c-\frac{c'}{2}}\right) = y_i + O\left(\frac{\log^{\frac{c'}{2}}(d/\delta)}{d}\right)$$

467 Likewise,

$$\|f\|_{k_{\sigma}}^2 = a_{c'}^{-2} m + O\left(m^2 \left(\frac{\log(d/\delta)}{d}\right)^{\frac{c'}{2}}\right) = a_{c'}^{-2} m + O\left(\log^{\frac{c'}{2}}(d/\delta) d^{2c-\frac{c'}{2}}\right) = a_{c'}^{-2} m + O\left(\frac{\log^{\frac{c'}{2}}(d/\delta)}{d}\right)$$

468

□

469 Based on lemma 13, in order to find  $\mathbf{v}$  that satisfies equation (7) it is natural to take

$$\mathbf{v} = \frac{1}{\sqrt{q}} (\check{f}(\omega_1), \dots, \check{f}(\omega_q))$$

470 In which case  $\mathbb{E} \|\mathbf{v}\|_2^2 = \|f\|_{k_{\sigma}}^2$  and  $\mathbb{E} [\langle \mathbf{v}, \Psi_{\omega}(\mathbf{x}) \rangle] = \mathbb{E} [f_{\omega}(\mathbf{x})] = f(\mathbf{x})$ . In fact, theorem 4 together  
 471 with Chebyshev's inequality indeed implies that for large  $q$  equation (7) holds. However, this analysis  
 472 requires  $q \approx \frac{m^2}{d}$  while we want  $q \approx \frac{m}{d}$ . In the remaining part of this section we undertake a more  
 473 delicate analysis of the rate in which  $f_{\omega}$  approximates  $f$  in our specific case. This analysis will imply  
 474 that  $q = \tilde{O}\left(\frac{m}{d}\right)$  suffices for equation (7) to hold w.h.p. Indeed, we will prove that

475 **Lemma 15.** *W.p.  $1 - \delta - 2^{\Omega(d)}$  over the choice of  $S$  and  $\omega$ , we have that*

$$\forall i \in [m], \quad |f_\omega(\mathbf{x}_i) - f(\mathbf{x}_i)| \leq O\left(\sqrt{\frac{m \log^{c'+2}(m/\delta)}{dq}}\right)$$

476 Together with lemma 13 and Markov's inequality we have

477 **Theorem 16.** *W.p.  $1 - \delta - 2^{\Omega(d)}$  over the choice of  $S$  and  $\omega$ , we have that*

$$\langle \mathbf{v}, \Psi_\omega(\mathbf{x}_i) \rangle = f_\omega(\mathbf{x}_i) = y_i + O\left(\frac{\log^{\frac{c'}{2}}(d/\delta)}{d}\right) + O\left(\sqrt{\frac{d^{c-1} \log^{c'+2}(d/\delta)}{q}}\right) \text{ for all } i$$

478 and

$$\|\mathbf{v}\|_2^2 = O(m/\delta) + O\left(\frac{\log^{\frac{c'}{2}}(d/\delta)}{d\delta}\right)$$

479 Choosing  $\delta = \frac{1}{\log(m)}$  we get that for  $q = \tilde{O}(d^{c-1})$  equation (7) holds w.p.  $1 - o(1)$ . This proves  
 480 theorem 7. The remaining part of the section is a proof of lemma 14. We will need the following  
 481 version of Hoeffding's bound. A distribution  $\mu$  on  $\mathbb{R}$  is called  $(\delta, B)$ -bounded if  $\Pr_{X \sim \mu}(|X| > B) \leq$   
 482  $\delta$ .

483 **Lemma 17.** *Let  $\mu$  be a  $(\delta, B)$ -bounded distribution and let  $X_1, \dots, X_m$  be i.i.d. r.v. from  $\mu$ . Then,*  
 484 *w.p.  $1 - m\delta - \delta'$*

$$\left| \mathbb{E}_{X \sim \mu} [X] - \frac{1}{m} \sum_{i=1}^m X_i \right| \leq B \sqrt{\frac{2 \ln(\delta'/2)}{m}} + \frac{2\sqrt{\delta} \mathbb{E}_{X \sim \mu} X^2}{1 - \delta}$$

485 *Proof.* We note that given that  $X_i \in [-B, B]$  for all  $i$  we have by Hoeffding's bound that w.p.  $1 - \delta'$

$$\left| \frac{1}{m} \sum_{i=1}^m X_i - \mathbb{E}_{X \sim \mu} [X | X \in [-B, B]] \right| \leq B \sqrt{\frac{2 \ln(\delta'/2)}{m}}$$

486 We note that

$$\begin{aligned} \mathbb{E}_{X \sim \mu} [X | X \in [-B, B]] &= \frac{\mathbb{E}_{X \sim \mu} X + \delta \mathbb{E}_{X \sim \mu} [X | X \notin [-B, B]]}{1 - \delta} \\ &= \frac{\mathbb{E}_{X \sim \mu} X + \mathbb{E}_{X \sim \mu} [X \mathbb{1}_{X \notin [-B, B]}]}{1 - \delta} \end{aligned}$$

487 Hence, by Cauchy-Schwartz,

$$\left| \mathbb{E}_{X \sim \mu} [X | X \in [-B, B]] - \mathbb{E}_{X \sim \mu} [X] \right| \leq \frac{\delta}{1 - \delta} \left| \mathbb{E}_{X \sim \mu} X \right| + \frac{\sqrt{\delta} \mathbb{E}_{X \sim \mu} X^2}{1 - \delta} \leq \frac{2\sqrt{\delta} \mathbb{E}_{X \sim \mu} X^2}{1 - \delta}$$

488

□

489 Recall now that by example ??

$$\check{f}(\omega) = \sum_{i=1}^m \frac{y_i}{a_{c'-1}} h_{c'-1}(\langle \mathbf{x}_i, \omega \rangle) \mathbf{x}_i$$

490 Hence, for any  $\mathbf{x}$ ,

$$f_\omega(\mathbf{x}) = \frac{1}{q} \sum_{j=1}^q \sum_{i=1}^m \frac{y_i}{a_{c'-1}} h_{c'-1}(\langle \mathbf{x}_i, \omega_j \rangle) \langle \mathbf{x}_i, \mathbf{x} \rangle \sigma(\langle \omega_j, \mathbf{x} \rangle)$$

491 In particular, fixing  $S$ ,  $f_\omega(\mathbf{x})$  is an average of the  $q$  i.i.d. random variables

$$f_\omega(\mathbf{x}) = \frac{1}{q} \sum_{j=1}^q Y(\omega_j, \mathbf{x})$$

492 Where

$$Y(\omega, \mathbf{x}) = \sum_{i=1}^m \frac{y_i}{a_{c'-1}} h_{c'-1}(\langle \mathbf{x}_i, \omega \rangle) \langle \mathbf{x}_i, \mathbf{x} \rangle \sigma(\langle \omega, \mathbf{x} \rangle)$$



493 **Lemma 18.** *W.p.  $\geq 1 - \delta$  over the choice of  $S$ , we have that for every  $i \in [m]$ ,  $Y(\omega, \mathbf{x}_i)$  is*  
 494  *$\left(\delta + 2^{-\Omega(d)}, O\left(\sqrt{\frac{m \log^{c'+1}(m/\delta)}{d}}\right)\right)$ -bounded.*

495 *Proof.* Fix  $\omega$  with  $\|\omega\| \leq 2\sqrt{d}$ . We have that  $Y(\omega, \mathbf{x}_i)$ , as a function of  $S$ , is a random  
 496 variable that is a sum of a single random variable (the summand that corresponds  $\mathbf{x}_i$ ) that is  
 497  $\left(\delta, O\left(\sqrt{\log^{c'-1}(1/\delta)}\right)\right)$ -bounded, as well as  $(m - 1)$  additional i.i.d random variables that  
 498 have mean 0, are  $\left(\delta, O\left(\sqrt{\frac{\log^{c'}(1/\delta)}{d}}\right)\right)$ -bounded, and has second moment  $O\left(\frac{1}{d}\right)$ . By lemma 16  
 499 we have that

$$|Y(\omega, \mathbf{x}_i)| \leq O\left(\sqrt{\frac{m \log^{c'+1}(1/\delta)}{d}}\right) + O\left(\frac{2m\sqrt{\delta/d}}{1-\delta}\right)$$

500 w.p.  $1 - (m + 1)\delta$ . Equivalently,

$$|Y(\omega, \mathbf{x}_i)| \leq O\left(\sqrt{\frac{m \log^{c'+1}(m/\delta)}{d}}\right) + O\left(\frac{2\sqrt{(m+1)\delta/d}}{1-\delta}\right) = O\left(\sqrt{\frac{m \log^{c'+1}(m/\delta)}{d}}\right)$$

501 w.p.  $1 - \delta$ . We have shown that

$$\mathbb{E}_{\omega} \mathbb{E}_S \left[ 1 \left[ |Y(\omega, \mathbf{x}_i)| \geq O\left(\sqrt{\frac{m \log^{c'+1}(m/\delta)}{d}}\right) \text{ and } \|\omega\| \leq 2\sqrt{d} \right] \right] \leq \delta$$

502 Changing the order of summation and using Markov, we get that w.p.  $\geq 1 - \sqrt{\delta}$  over the choice of  $S$ ,  
 503 we have that

$$\Pr_{\omega} \left[ |Y(\omega, \mathbf{x}_i)| \geq O\left(\sqrt{\frac{m \log^{c'+1}(m/\delta)}{d}}\right) \text{ and } \|\omega\| \leq 2\sqrt{d} \right] \leq \sqrt{\delta}$$

504 Replacing  $\delta$  with  $\sqrt{\delta}$  and using the fact that  $\log(m/\delta^2) \leq 2 \log(m/\delta)$  we get that that w.p.  $\geq 1 - \delta$   
 505 over the choice of  $S$ , we have that

$$\Pr_{\omega} \left[ |Y(\omega, \mathbf{x}_i)| \geq O\left(\sqrt{\frac{m \log^{c'+1}(m/\delta)}{d}}\right) \text{ and } \|\omega\| \leq 2\sqrt{d} \right] \leq \delta$$

506 Hence, since  $\Pr_{\omega}(\|\omega\| > 2\sqrt{d}) \leq 2^{-\Omega(d)}$ , we conclude that w.p.  $\geq 1 - \delta$  over the choice of  $S$ ,  
 507  $Y(\omega, \mathbf{x}_i)$  is  $\left(\delta + 2^{-\Omega(d)}, O\left(\sqrt{\frac{m \log^{c'+1}(m/\delta)}{d}}\right)\right)$ -bounded. Finally, using a union bound, and the  
 508 fact that  $\log(m^2/\delta) \leq 2 \log(m/\delta)$  we conclude that w.p.  $\geq 1 - \delta$  over the choice of  $S$ , we have that  
 509 for every  $i \in [m]$ ,  $Y(\omega, \mathbf{x}_i)$  is  $\left(\delta + 2^{-\Omega(d)}, O\left(\sqrt{\frac{m \log^{c'+1}(m/\delta)}{d}}\right)\right)$ -bounded.  $\square$

510 *Proof.* (of lemma 14) By lemma 17 we conclude that w.p  $1 - \delta$  over the choice of  $S$ , for every  $i$ ,  
 511  $f_{\omega}(x_i)$  is an average of  $q$  i.i.d.  $\left(\delta + 2^{-\Omega(d)}, O\left(\sqrt{\frac{m \log^{c'+1}(m/\delta)}{d}}\right)\right)$ -bounded random variables.  
 512 Furthermore, the second moment of each of these variables is  $O(m)$ . Using lemma 16 we have that  
 513 w.p.  $1 - (m + 1)\delta - m2^{-\Omega(d)}$  over the choice of  $\omega$ ,

$$|f_{\omega}(\mathbf{x}_i) - f(\mathbf{x}_i)| \leq O\left(\sqrt{\frac{m \log^{c'+2}(m/\delta)}{dq}}\right)$$

514 Using the assumption that  $m = d^c$  and simple manipulation we get that w.p.  $1 - \delta - 2^{-\Omega(d)}$  over the  
 515 choice of  $\omega$ ,

$$|f_\omega(\mathbf{x}_i) - f(\mathbf{x}_i)| \leq O\left(\sqrt{\frac{m \log^{c'+2}(m/\delta)}{dq}}\right)$$

516

□

## 517 A.5 Boundness of distributions

518 Recall that a distribution  $\mathcal{D}$  on  $\mathbb{S}^{d-1}$  is  $R$ -bounded if for every  $\mathbf{u} \in \mathbb{S}^{d-1}$ ,  $\mathbb{E}_{\mathbf{x} \sim \mathcal{D}} \langle \mathbf{u}, \mathbf{x} \rangle^2 \leq \frac{R^2}{d}$ . We  
 519 next describe a few examples of 1-bounded and  $(1 + o(1))$ -bounded distributions.

520 1. The uniform distribution is 1-bounded. Indeed, for any  $\mathbf{u} \in \mathbb{S}^{d-1}$  and uniform  $\mathbf{x}$  in  $\mathbb{S}^{d-1}$   
 521 we have

$$\mathbb{E}_{\mathbf{x}} \langle \mathbf{u}, \mathbf{x} \rangle^2 = \sum_{i,j} \mathbb{E}_{\mathbf{x}} u_i u_j x_i x_j = \sum_i \mathbb{E}_{\mathbf{x}} u_i^2 x_i^2 = \sum_i u_i^2 \mathbb{E}_{\mathbf{x}} x_i^2 = \frac{1}{d} \sum_i u_i^2 = \frac{\|\mathbf{u}\|^2}{d} = \frac{1}{d}$$

522 2. Similarly, the uniform distribution on the discrete cube  $\left\{-\frac{1}{\sqrt{d}}, \frac{1}{\sqrt{d}}\right\}^d$  is 1-bounded. Indeed,

523 for any  $\mathbf{u} \in \mathbb{S}^{d-1}$  and uniform  $\mathbf{x}$  in  $\left\{-\frac{1}{\sqrt{d}}, \frac{1}{\sqrt{d}}\right\}^d$  we have

$$\mathbb{E}_{\mathbf{x}} \langle \mathbf{u}, \mathbf{x} \rangle^2 = \sum_{i,j} \mathbb{E}_{\mathbf{x}} u_i u_j x_i x_j = \sum_i \mathbb{E}_{\mathbf{x}} u_i^2 x_i^2 = \sum_i u_i^2 \mathbb{E}_{\mathbf{x}} x_i^2 = \frac{1}{d} \sum_i u_i^2 = \frac{\|\mathbf{u}\|^2}{d} = \frac{1}{d}$$

524 3. Let  $\mathcal{D}$  be the uniform distribution on the points  $\mathbf{x}_1, \dots, \mathbf{x}_m \in \mathbb{S}^{d-1}$ . Denote by  $X$  the  $d \times m$   
 525 matrix whose  $i'$  column is  $\frac{\mathbf{x}_i}{\sqrt{m}}$ . We have

$$\begin{aligned} \max_{\mathbf{u} \in \mathbb{S}^{d-1}} \mathbb{E}_{\mathbf{x} \sim \mathcal{D}} \langle \mathbf{u}, \mathbf{x} \rangle^2 &= \max_{\mathbf{u} \in \mathbb{S}^{d-1}} \frac{1}{m} \sum_{i=1}^m \langle \mathbf{u}, \mathbf{x}_i \rangle^2 \\ &= \max_{\mathbf{u} \in \mathbb{S}^{d-1}} \frac{1}{m} \sum_{i=1}^m \mathbf{u}^T \mathbf{x}_i \mathbf{x}_i^T \mathbf{u} \\ &= \max_{\mathbf{u} \in \mathbb{S}^{d-1}} \mathbf{u}^T X X^T \mathbf{u} \\ &= \|X\|^2 \end{aligned}$$

526 Hence,  $\mathcal{D}$  is  $\|X\|$ -bounded. In particular, by standard results in random matrices (e.g.  
 527 theorem 5.39 in [24]), if  $\{\mathbf{x}_i\}_{i=1}^m$  are independent and uniform points in the sphere and  
 528  $m = \omega(d)$  then w.p.  $1 - o(1)$  over the choice of the points,  $\mathcal{D}$  is  $(1 + o(1))$ -bounded.

529 4. The uniform distribution on any orthonormal basis  $\mathbf{v}_1, \dots, \mathbf{v}_d$  is 1-bounded. Indeed, for any  
 530  $\mathbf{u} \in \mathbb{S}^{d-1}$  and uniform  $i \in [d]$  we have

$$\mathbb{E}_i \langle \mathbf{u}, \mathbf{v}_i \rangle^2 = \frac{1}{d} \sum_{i=1}^d \langle \mathbf{u}, \mathbf{v}_i \rangle^2 = \frac{\|\mathbf{u}\|^2}{d} = \frac{1}{d}$$
